# Supplementary material
Source: PubMed Central journal article supplement (PMC5578417)
Supplement: NIHMS900472-supplement-supplement_1.pdf [file NIHMS900472-supplement-supplement_1.pdf]

**eAppendix Table.** Data Abstraction Form

| <b>Category</b>                           | <b>Data</b>                                                                                                                                                                                                   | <b>Description</b>                                                                                                                                                                                                                                                                                               |
|-------------------------------------------|---------------------------------------------------------------------------------------------------------------------------------------------------------------------------------------------------------------|------------------------------------------------------------------------------------------------------------------------------------------------------------------------------------------------------------------------------------------------------------------------------------------------------------------|
| Accountable care organization (ACO) name  |                                                                                                                                                                                                               | Name of ACO                                                                                                                                                                                                                                                                                                      |
| Date of extraction                        |                                                                                                                                                                                                               | Date website was accessed                                                                                                                                                                                                                                                                                        |
| Medicare start date                       | <ul style="list-style-type: none"> <li>• April 2012</li> <li>• July 2012</li> <li>• January 2013</li> <li>• January 2014</li> </ul>                                                                           | Date the ACO became a Medicare Shared Savings Program participant                                                                                                                                                                                                                                                |
| Location (state, zip code)                |                                                                                                                                                                                                               | State and zip code where ACO contact address is located                                                                                                                                                                                                                                                          |
| ACO website link                          |                                                                                                                                                                                                               | Web address of public reporting document                                                                                                                                                                                                                                                                         |
| External stakeholders                     | <ul style="list-style-type: none"> <li>• Yes</li> <li>• No</li> </ul>                                                                                                                                         | Determined based on distributions to investors/shareholders, comments on the website, or the inclusion of a nonparticipant investor or company on the governing board                                                                                                                                            |
| Number of participating entities in ACO   | <ul style="list-style-type: none"> <li>• 1</li> <li>• 2-5</li> <li>• 6-10</li> <li>• 11-20</li> <li>• More than 20</li> </ul>                                                                                 | Reflects the number of participating entities with distinct taxpayer identification numbers, as listed on each ACO website                                                                                                                                                                                       |
| Composition of ACO participating entities | <ul style="list-style-type: none"> <li>• Primary care provider (PCP)</li> <li>• Specialists</li> <li>• Hospitals</li> <li>• Supplier</li> <li>• Home care</li> <li>• Chiropractor</li> <li>• Other</li> </ul> | PCP, specialist, and hospital participants were included if they existed within a larger entity as determined by examining the participant list and performing a Google search for all business names; other categories of participating entities were only included if they were a distinct and separate entity |
| Academic medical center (AMC)             | <ul style="list-style-type: none"> <li>• Yes</li> <li>• No</li> </ul>                                                                                                                                         | An ACO with any Association of American Medical Colleges (AAMC) member institution was termed an AMC                                                                                                                                                                                                             |
| Distribution plan online                  | <ul style="list-style-type: none"> <li>• Yes</li> <li>• No</li> </ul>                                                                                                                                         | Reflects if the distribution plan was on the ACO website                                                                                                                                                                                                                                                         |
| Savings distribution plan                 | <ul style="list-style-type: none"> <li>• To be determined (TBD)</li> <li>• General statements</li> <li>• Detailed plan</li> </ul>                                                                             | Recorded if the distribution plan was listed as TBD, had general statements without specific percentages, or was detailed with specific percentages                                                                                                                                                              |
| Plan covers expenses first                | <ul style="list-style-type: none"> <li>• Yes</li> <li>• No</li> </ul>                                                                                                                                         | Reflects if savings were used to cover ACO expenses before being distributed to another category                                                                                                                                                                                                                 |
| Type of expenses covered                  | <ul style="list-style-type: none"> <li>• Information technology (IT)</li> <li>• Administration</li> <li>• Care management</li> <li>• Infrastructure</li> </ul>                                                | If expenses were covered first, the type of expenses covered were recorded based on statements within the distribution plan                                                                                                                                                                                      |

|                                                |                                                                                                                                             |                                                                                                                                                                          |
|------------------------------------------------|---------------------------------------------------------------------------------------------------------------------------------------------|--------------------------------------------------------------------------------------------------------------------------------------------------------------------------|
|                                                | <ul style="list-style-type: none"> <li>• Unknown</li> <li>• Other</li> </ul>                                                                |                                                                                                                                                                          |
| Provider distribution                          | <ul style="list-style-type: none"> <li>• Yes</li> <li>• No</li> </ul>                                                                       | Inclusion of providers in the distribution plan                                                                                                                          |
| References how providers are paid              | <ul style="list-style-type: none"> <li>• Yes</li> <li>• No</li> </ul>                                                                       | States how provider distribution amounts would be determined                                                                                                             |
| Provider distribution criteria                 | <ul style="list-style-type: none"> <li>• Attribution</li> <li>• Quality performance</li> <li>• Cost performance</li> <li>• Other</li> </ul> | If there was a reference to how provider distributions would be determined, what criteria were involved?                                                                 |
| Differential distribution                      | <ul style="list-style-type: none"> <li>• Yes</li> <li>• No</li> </ul>                                                                       | If an ACO had specialists or a hospital, did they plan to give a different percent to each type of participant?                                                          |
| ACO infrastructure distribution                | %                                                                                                                                           | Percent designated for infrastructure (includes IT, care management, administration, personnel)                                                                          |
| ACO participants' distribution                 | %                                                                                                                                           | Percent given to participants (includes providers and hospitals)                                                                                                         |
| Hospital's distribution                        | %                                                                                                                                           | Percent designated for hospitals                                                                                                                                         |
| ACO providers' distribution                    | %                                                                                                                                           | Percent designated for providers (includes PCPs and specialists)                                                                                                         |
| PCP distribution                               | %                                                                                                                                           | Percent given to PCPs                                                                                                                                                    |
| Specialists' distribution                      | %                                                                                                                                           | Percent given to specialists                                                                                                                                             |
| Other distributions                            | %                                                                                                                                           | Percent given to other categories (ie, investors/shareholders, nonparticipants, or reserves)                                                                             |
| Distributions subject to change                | <ul style="list-style-type: none"> <li>• Yes</li> <li>• No</li> </ul>                                                                       | Did the ACO state that designated percentages could change?                                                                                                              |
| Yearly distribution change                     | <ul style="list-style-type: none"> <li>• Yes</li> <li>• No</li> </ul>                                                                       | Were different percentages allocated for following years?                                                                                                                |
| Plan tiered                                    | <ul style="list-style-type: none"> <li>• Yes</li> <li>• No</li> </ul>                                                                       | A plan was tiered if it had a certain dollar value that would be given to a category followed by percentage allocations                                                  |
| Number of tiers                                | <ul style="list-style-type: none"> <li>• 1</li> <li>• 2</li> <li>• 3</li> </ul>                                                             | If tiered, this represents the number of tiers (ie, a plan that covers expenses first and then allocates the remaining money on a percentage basis would be a tier of 1) |
| Distribution reference to patient improvements | <ul style="list-style-type: none"> <li>• Yes</li> <li>• No</li> </ul>                                                                       | Did the distribution plan make a reference to savings being used for improvement in patient programs or care?                                                            |
| Distribution reference to new patient programs | <ul style="list-style-type: none"> <li>• Yes</li> <li>• No</li> </ul>                                                                       | Were distributions going to be used to fund new patient programs?                                                                                                        |
| New patient program details                    |                                                                                                                                             | What new patient programs were initiated?                                                                                                                                |
| Aggregate savings year 1                       | \$                                                                                                                                          | Dollar value of shared savings for performance year 1, if reported                                                                                                       |
